# Supplementary material for: Nanoparticle delivery of Wnt-1 siRNA enhances photodynamic therapy by inhibiting epithelial–mesenchymal transition for oral cancer
Source: Royal Society of Chemistry journal article supplement (doi:10.1039/c6bm00833j), 2017-01-01
Supplement: c6bm00833j1.pdf [file c6bm00833j1.pdf]

# Nanoparticle delivery of Wnt-1 siRNA enhances photodynamic therapy by inhibiting epithelial-mesenchymal transition for oral cancer

Chuan Ma,<sup>a</sup> Leilei Shi,<sup>b</sup> Yu Huang,<sup>b</sup> Lingyue Shen,<sup>a</sup> Hao Peng,<sup>a</sup> Xinyuan Zhu,<sup>b\*</sup> and Guoyu Zhou <sup>a\*</sup>

<sup>a</sup> Ninth People's Hospital Affiliated to Shanghai Jiao Tong University Medical College, School of Stomatology, Department of Oral Maxillofacial Surgery, Shanghai Institute of Stomatology, Shanghai Key Point Laboratory of Stomatology, 639 Zhizaoju Road, Shanghai 200011, P. R. China

<sup>b</sup> School of Chemistry and Chemical Engineering, Shanghai Key Lab of Electrical Insulation and Thermal Aging, Shanghai Jiao Tong University, 800 Dongchuan Road, Shanghai 200240, P. R. China

\* Correspondence to: xyzhu@sjtu.edu.cn; guoyuzhou@hotmail.com. Fax: +86-21-

54741297

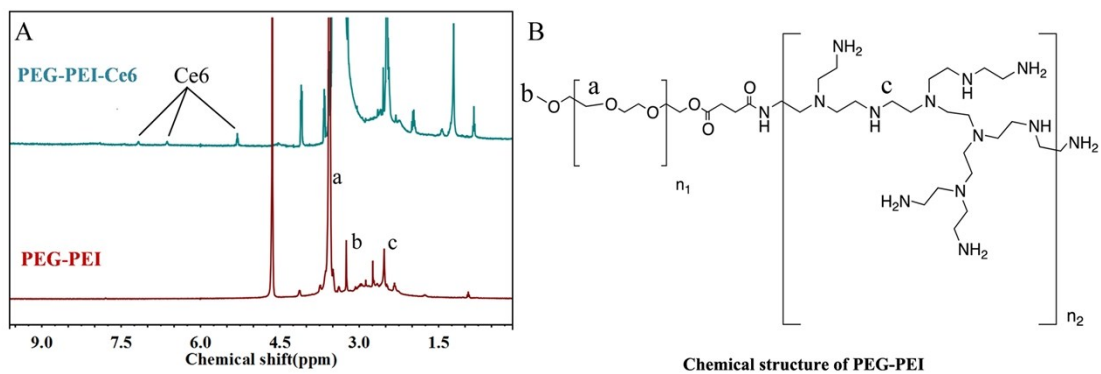

**Fig. S1.** (A)  $^1\text{H}$  NMR of PEG-PEI and PEG-PEI-Ce6. NMR spectra of the copolymer presents the peaks associated with the original polymer blocks. (B) Structure of PEG-PEI.

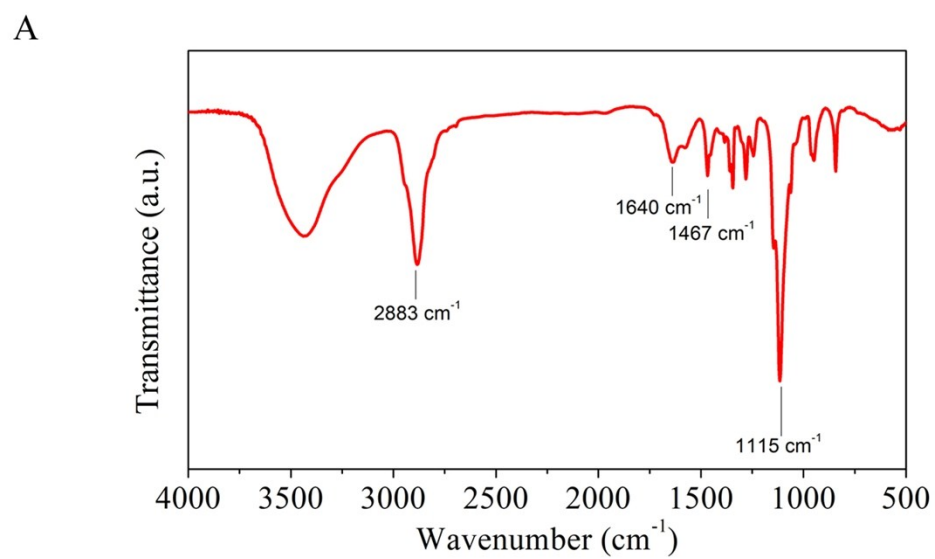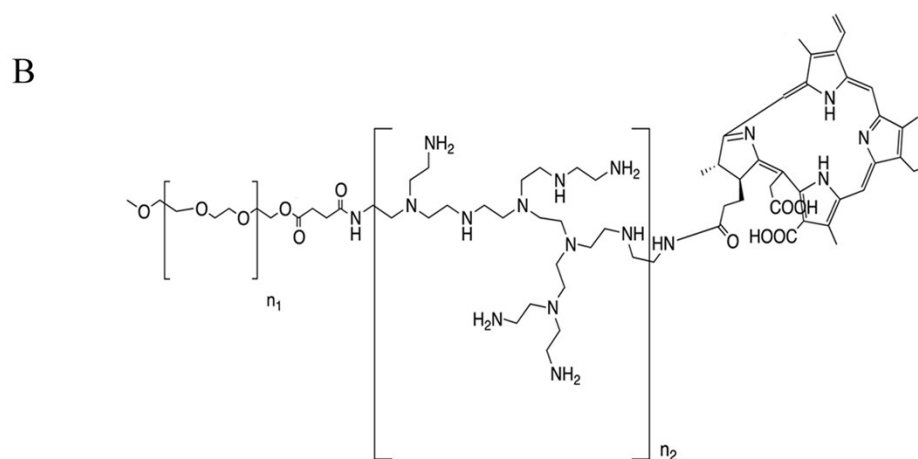

Structure of PEG-PEI-Ce6

**Fig. S2.** FTIR spectrum (A) and chemical structure of PEG-PEI-Ce6 (B).

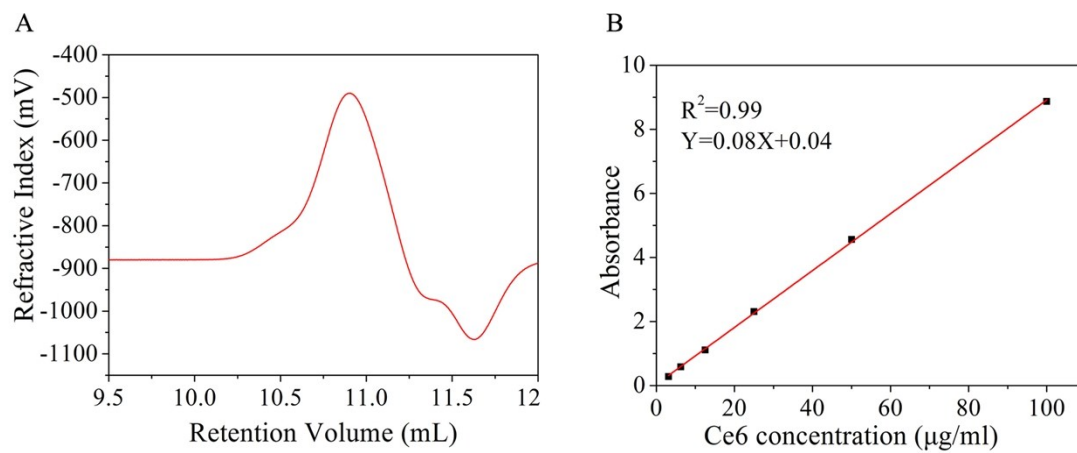

**Fig. S3.** GPC curve of PEG-PEI-Ce6 (A) and regression curve of the absorbance against standard Ce6 concentration (B).

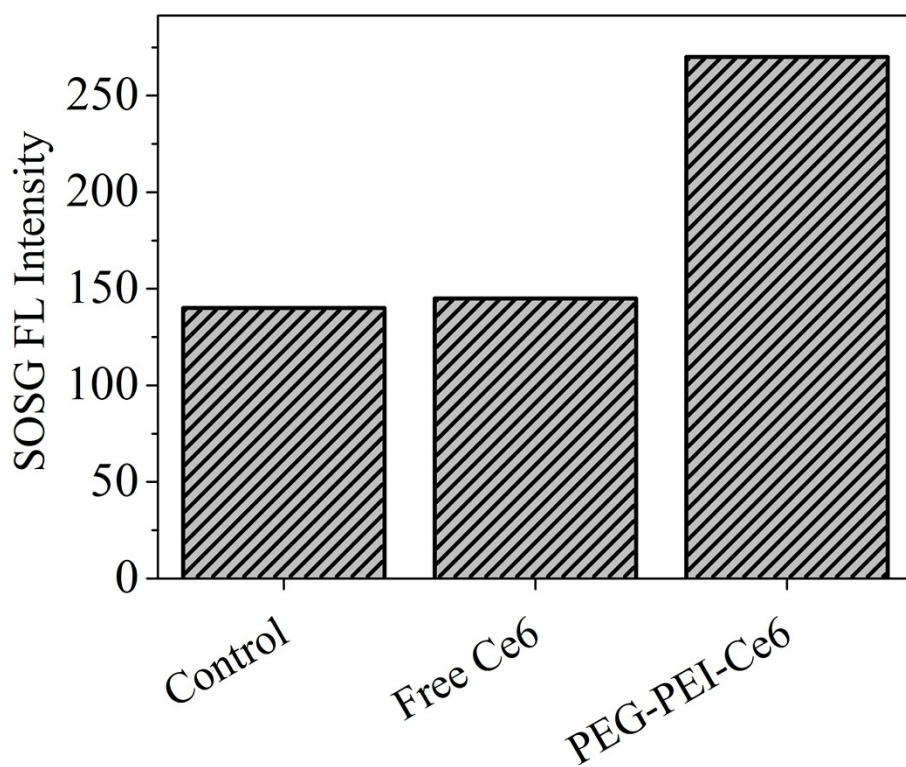

**Fig. S4.** Singlet oxygen generation (SOG) of free Ce6 and PEG-PEI-Ce6 in deuterium depleted water (Ce6, 1  $\mu\text{g/ml}$ ).

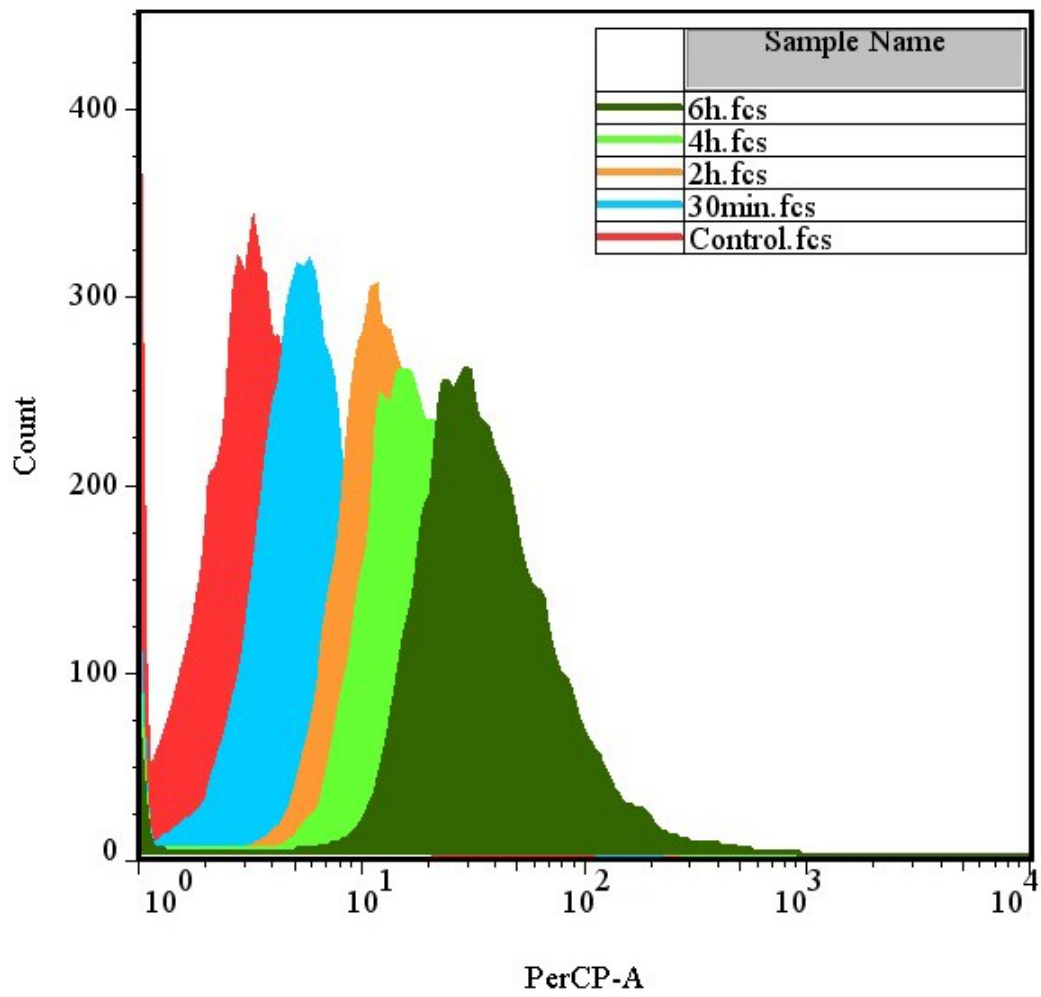

**Fig. S5.** Cellular uptake characteristics of PEG-PEI-Ce6/siRNA nanoparticles using FACS in a cell culture system after 6 h post-incubation.
